# Supplementary material
Source: PubMed Central journal article supplement (PMC9872596)
Supplement: aac.01312-22-s0001.pdf [file aac.01312-22-s0001.pdf]

# **Evaluation of Empirical Dosing Regimens for Meropenem in ICU Patients Using Population Pharmacokinetic Modeling and Target Attainment Analysis**

Guohua An<sup>1\*</sup>, C. Buddy Creech<sup>2</sup>, Nan Wu<sup>1</sup>, Roger L. Nation<sup>3</sup>, Kenan Gu<sup>4</sup>, Demet Nalbant<sup>1</sup>, Natalia Jimenez-Truque<sup>2</sup>, William Fissell<sup>5</sup>, Stephanie Rolsma<sup>2</sup>, Pratish C. Patel<sup>6</sup>, Amy Watanabe<sup>7</sup>, Nicholas Fishbane<sup>7</sup>, Carl M.J. Kirkpatrick<sup>3</sup>, Cornelia B. Landersdorfer<sup>3</sup>, and Patricia Winokur<sup>8,\*</sup>

<sup>1</sup>Department of Pharmaceutical Sciences and Experimental Therapeutics, College of Pharmacy, University of Iowa, USA

<sup>2</sup>Division of Pediatric Infectious Diseases, Vanderbilt University Medical Center, Nashville, TN, USA

<sup>3</sup>Monash Institute of Pharmaceutical Sciences, Monash University, Parkville, Victoria, Australia

<sup>4</sup>Division of Microbiology and Infectious Diseases, National Institute of Allergy and Infectious Diseases, USA

<sup>5</sup>Division of Nephrology and Hypertension, Vanderbilt University Medical Center, Nashville, TN, United States of America

<sup>6</sup> Department of Pharmaceutical Services, Vanderbilt University Medical Center, Nashville, TN, USA

<sup>7</sup> The Emmes Company, LLC, Rockville, MD, USA

<sup>8</sup>Division of Infectious Diseases, Carver College of Medicine, University of Iowa, USA

## SUPPLEMENTARY MATERIALS

**Table S1.** Predicted meropenem breakpoints following different dosing regimens in all subjects as well as subjects with different renal functions with targets 100%  $fT_{>MIC}$  or 40%  $fT_{>MIC}$ .

**Table S2.** Estimated percentage of subjects with  $C_{trough}$  exceeding predefined thresholds and Predicted probability of meropenem-induced nephrotoxicity and neurotoxicity.

**Figure S1.** Goodness-of-fit plots for the population PK model of meropenem. (A) Observed versus population-predicted meropenem concentrations, (B) observed versus individual-predicted meropenem concentrations, (C) conditional weighted residuals versus time since the last dose, (D) conditional weighted residuals versus population-predicted meropenem concentrations. Solid black lines represent lines of identity in (A) and (B) and zero residuals in (C) and (D). Trend lines are shown in red.

**Figure S2.** PTA of meropenem versus MIC following different dosing regimens with the target of 40%  $fT_{>MIC}$  (upper panel), 100%  $fT_{>MIC}$  (middle panel) and 100%  $fT_{>4x MIC}$  (lower panel).

**Figure S3.** Heatmap of PTA of meropenem at different MIC values following different dosing regimens in all subjects as well as subjects with different renal functions, with the PK/PD targets of 40%  $fT_{>MIC}$ , 100%  $fT_{>MIC}$ , and 100%  $fT_{>4x MIC}$ . Color coding: green, PTA  $\geq 90\%$ ; yellow, PTA 80% - 89%; orange, PTA 50% - 79%; red, PTA  $< 50\%$

**Table S1.** Predicted meropenem breakpoints following different dosing regimens in all subjects as well as subjects with different renal functions with targets 100%  $fT>MIC$  or 40%  $fT>MIC$ .

| Dosing Regimen               | CrCL                 | Meropenem breakpoints (mg/L)<br>(i.e. the highest MIC at which $\geq 90$ % of the subjects achieve targets) |                      |
|------------------------------|----------------------|-------------------------------------------------------------------------------------------------------------|----------------------|
|                              |                      | Target 100 % $fT>MIC$                                                                                       | Target 40 % $fT>MIC$ |
| 0.5g Q6h 30-min infusion     | all                  | 2                                                                                                           | 4                    |
|                              | less than 60 mL/min  | 4                                                                                                           | 8                    |
|                              | 60 to 129 mL/min     | 2                                                                                                           | 8                    |
|                              | 130 mL/min and above | 0.5                                                                                                         | 4                    |
| 0.5g Q8h 30-min infusion     | all                  | 1                                                                                                           | 4                    |
|                              | less than 60 mL/min  | 4                                                                                                           | 8                    |
|                              | 60 to 129 mL/min     | 1                                                                                                           | 4                    |
|                              | 130 mL/min and above | 0.25                                                                                                        | 2                    |
| 1g Q8h 30-min infusion       | all                  | 2                                                                                                           | 8                    |
|                              | less than 60 mL/min  | 8                                                                                                           | 16                   |
|                              | 60 to 129 mL/min     | 2                                                                                                           | 8                    |
|                              | 130 mL/min and above | 0.5                                                                                                         | 4                    |
| 1g Q12h 30-min infusion      | all                  | 0.5                                                                                                         | 4                    |
|                              | less than 60 mL/min  | 2                                                                                                           | 8                    |
|                              | 60 to 129 mL/min     | 0.5                                                                                                         | 4                    |
|                              | 130 mL/min and above | <0.125                                                                                                      | 2                    |
| 2g Q8h 30-min infusion       | all                  | 4                                                                                                           | 16                   |
|                              | less than 60 mL/min  | 16                                                                                                          | 32                   |
|                              | 60 to 129 mL/min     | 4                                                                                                           | 16                   |
|                              | 130 mL/min and above | 1                                                                                                           | 8                    |
| 2g Q12h 30-min infusion      | all                  | 1                                                                                                           | 8                    |
|                              | less than 60 mL/min  | 4                                                                                                           | 16                   |
|                              | 60 to 129 mL/min     | 1                                                                                                           | 8                    |
|                              | 130 mL/min and above | 0.125                                                                                                       | 4                    |
| 0.5g Q6h 3-h infusion        | all                  | 2                                                                                                           | 4                    |
|                              | less than 60 mL/min  | 8                                                                                                           | 8                    |
|                              | 60 to 129 mL/min     | 4                                                                                                           | 8                    |
|                              | 130 mL/min and above | 1                                                                                                           | 4                    |
| 0.5g Q8h 3-h infusion        | all                  | 1                                                                                                           | 4                    |
|                              | less than 60 mL/min  | 4                                                                                                           | 8                    |
|                              | 60 to 129 mL/min     | 2                                                                                                           | 4                    |
|                              | 130 mL/min and above | 0.5                                                                                                         | 2                    |
| 1g Q8h 3-h infusion          | all                  | 2                                                                                                           | 8                    |
|                              | less than 60 mL/min  | 8                                                                                                           | 16                   |
|                              | 60 to 129 mL/min     | 4                                                                                                           | 8                    |
|                              | 130 mL/min and above | 1                                                                                                           | 4                    |
| 1g Q12h 3-h infusion         | all                  | 0.5                                                                                                         | 8                    |
|                              | less than 60 mL/min  | 4                                                                                                           | 16                   |
|                              | 60 to 129 mL/min     | 1                                                                                                           | 8                    |
|                              | 130 mL/min and above | 0.125                                                                                                       | 4                    |
| 2g Q8h 3-h infusion          | all                  | 4                                                                                                           | 16                   |
|                              | less than 60 mL/min  | 16                                                                                                          | 32                   |
|                              | 60 to 129 mL/min     | 8                                                                                                           | 16                   |
|                              | 130 mL/min and above | 2                                                                                                           | 8                    |
| 2g Q12h 3-h infusion         | all                  | 1                                                                                                           | 16                   |
|                              | less than 60 mL/min  | 8                                                                                                           | 32                   |
|                              | 60 to 129 mL/min     | 4                                                                                                           | 16                   |
|                              | 130 mL/min and above | 0.25                                                                                                        | 8                    |
| 2g daily continuous infusion | all                  | 4                                                                                                           | 4                    |
|                              | less than 60 mL/min  | 8                                                                                                           | 8                    |
|                              | 60 to 129 mL/min     | 4                                                                                                           | 4                    |
|                              | 130 mL/min and above | 4                                                                                                           | 4                    |
| 4g daily continuous infusion | all                  | 8                                                                                                           | 8                    |

|                              |                      |    |    |
|------------------------------|----------------------|----|----|
|                              | less than 60 mL/min  | 16 | 16 |
|                              | 60 to 129 mL/min     | 8  | 8  |
|                              | 130 mL/min and above | 8  | 8  |
| 6g daily continuous infusion | all                  | 16 | 16 |
|                              | less than 60 mL/min  | 32 | 32 |
|                              | 60 to 129 mL/min     | 16 | 16 |
|                              | 130 mL/min and above | 8  | 8  |
| 8g daily continuous infusion | all                  | 16 | 16 |
|                              | less than 60 mL/min  | 32 | 32 |
|                              | 60 to 129 mL/min     | 16 | 16 |
|                              | 130 mL/min and above | 16 | 16 |

**Table S2.** Estimated percentage of subjects with Ctrough exceeding predefined thresholds and Predicted probability of meropenem-induced nephrotoxicity and neurotoxicity.

| Meropenem dosing regimen | CL <sub>CR</sub>     | Estimated % of subjects with Ctrough > 44.5 mg/L | Predicted possibility of nephrotoxicity (%) | Estimated % of subjects with Ctrough > 64.2 mg/L | Predicted possibility of neurotoxicity (%) |
|--------------------------|----------------------|--------------------------------------------------|---------------------------------------------|--------------------------------------------------|--------------------------------------------|
| 0.5g Q6h 30-min infusion | all                  | 1.60                                             | 0.80                                        | 0.28                                             | 0.14                                       |
|                          | less than 60 mL/min  | 4.51                                             | 2.26                                        | 0.74                                             | 0.37                                       |
|                          | 60 to 129 mL/min     | 0.37                                             | 0.19                                        | 0.07                                             | 0.04                                       |
|                          | 130 mL/min and above | 0.16                                             | 0.08                                        | 0.08                                             | 0.04                                       |
| 0.5g Q8h 30-min infusion | all                  | 0.21                                             | 0.11                                        | 0.04                                             | 0.02                                       |
|                          | less than 60 mL/min  | 0.63                                             | 0.32                                        | 0.06                                             | 0.03                                       |
|                          | 60 to 129 mL/min     | 0.04                                             | 0.02                                        | 0.04                                             | 0.02                                       |
|                          | 130 mL/min and above | 0.00                                             | 0.00                                        | 0.00                                             | 0.00                                       |
| 1g Q8h 30-min infusion   | all                  | 4.84                                             | 2.42                                        | 1.30                                             | 0.65                                       |
|                          | less than 60 mL/min  | 12.80                                            | 6.40                                        | 3.66                                             | 1.83                                       |
|                          | 60 to 129 mL/min     | 1.52                                             | 0.76                                        | 0.26                                             | 0.13                                       |
|                          | 130 mL/min and above | 0.88                                             | 0.44                                        | 0.24                                             | 0.12                                       |
| 1g Q12h 30-min infusion  | all                  | 0.68                                             | 0.34                                        | 0.11                                             | 0.06                                       |
|                          | less than 60 mL/min  | 1.89                                             | 0.95                                        | 0.34                                             | 0.17                                       |
|                          | 60 to 129 mL/min     | 0.22                                             | 0.11                                        | 0.00                                             | 0.00                                       |
|                          | 130 mL/min and above | 0.00                                             | 0.00                                        | 0.00                                             | 0.00                                       |
| 2g Q8h 30-min infusion   | all                  | 23.21                                            | 11.61                                       | 10.75                                            | 5.38                                       |
|                          | less than 60 mL/min  | 48.40                                            | 24.20                                       | 25.43                                            | 12.72                                      |
|                          | 60 to 129 mL/min     | 15.26                                            | 7.63                                        | 5.30                                             | 2.65                                       |
|                          | 130 mL/min and above | 5.12                                             | 2.56                                        | 2.00                                             | 1.00                                       |
| 2g Q12h 30-min infusion  | all                  | 6.65                                             | 3.33                                        | 2.32                                             | 1.16                                       |
|                          | less than 60 mL/min  | 18.06                                            | 9.03                                        | 6.80                                             | 3.40                                       |
|                          | 60 to 129 mL/min     | 1.78                                             | 0.89                                        | 0.30                                             | 0.15                                       |
|                          | 130 mL/min and above | 1.20                                             | 0.60                                        | 0.40                                             | 0.20                                       |
| 0.5g Q6h 3-h infusion    | all                  | 2.19                                             | 1.10                                        | 0.37                                             | 0.19                                       |
|                          | less than 60 mL/min  | 6.34                                             | 3.17                                        | 1.20                                             | 0.60                                       |
|                          | 60 to 129 mL/min     | 0.41                                             | 0.21                                        | 0.00                                             | 0.00                                       |
|                          | 130 mL/min and above | 0.24                                             | 0.12                                        | 0.00                                             | 0.00                                       |

|                              |                      |       |       |       |       |
|------------------------------|----------------------|-------|-------|-------|-------|
| 0.5g Q8h 3-h infusion        | all                  | 0.33  | 0.17  | 0.04  | 0.02  |
|                              | less than 60 mL/min  | 1.03  | 0.52  | 0.11  | 0.06  |
|                              | 60 to 129 mL/min     | 0.04  | 0.02  | 0.00  | 0.00  |
|                              | 130 mL/min and above | 0.00  | 0.00  | 0.00  | 0.00  |
| 1g Q8h 3-h infusion          | all                  | 6.49  | 3.25  | 1.95  | 0.98  |
|                              | less than 60 mL/min  | 17.43 | 8.72  | 5.43  | 2.72  |
|                              | 60 to 129 mL/min     | 2.07  | 1.04  | 0.44  | 0.22  |
|                              | 130 mL/min and above | 0.72  | 0.36  | 0.32  | 0.16  |
| 1g Q12h 3-h infusion         | all                  | 0.81  | 0.41  | 0.16  | 0.08  |
|                              | less than 60 mL/min  | 2.23  | 1.12  | 0.40  | 0.20  |
|                              | 60 to 129 mL/min     | 0.19  | 0.10  | 0.04  | 0.02  |
|                              | 130 mL/min and above | 0.16  | 0.08  | 0.08  | 0.04  |
| 2g Q8h 3-h infusion          | all                  | 29.09 | 14.55 | 15.21 | 7.61  |
|                              | less than 60 mL/min  | 58.97 | 29.49 | 35.26 | 17.63 |
|                              | 60 to 129 mL/min     | 20.48 | 10.24 | 8.07  | 4.04  |
|                              | 130 mL/min and above | 5.84  | 2.92  | 2.56  | 1.28  |
| 2g Q12h 3-h infusion         | all                  | 8.63  | 4.32  | 3.11  | 1.56  |
|                              | less than 60 mL/min  | 22.86 | 11.43 | 8.80  | 4.40  |
|                              | 60 to 129 mL/min     | 2.89  | 1.45  | 0.81  | 0.41  |
|                              | 130 mL/min and above | 1.12  | 0.56  | 0.08  | 0.04  |
| 2g daily continuous infusion | all                  | 4.44  | 2.22  | 0.93  | 0.47  |
|                              | less than 60 mL/min  | 11.94 | 5.97  | 2.74  | 1.37  |
|                              | 60 to 129 mL/min     | 1.48  | 0.74  | 0.15  | 0.08  |
|                              | 130 mL/min and above | 0.32  | 0.16  | 0.08  | 0.04  |
| 4g daily continuous infusion | all                  | 28.68 | 14.34 | 11.77 | 5.89  |
|                              | less than 60 mL/min  | 55.77 | 27.89 | 27.66 | 13.83 |
|                              | 60 to 129 mL/min     | 21.78 | 10.89 | 6.26  | 3.13  |
|                              | 130 mL/min and above | 5.68  | 2.84  | 1.44  | 0.72  |
| 6g daily continuous infusion | all                  | 52.32 | 26.16 | 30.63 | 15.32 |
|                              | less than 60 mL/min  | 83.03 | 41.52 | 60.06 | 30.03 |
|                              | 60 to 129 mL/min     | 48.63 | 24.32 | 23.04 | 11.52 |
|                              | 130 mL/min and above | 17.28 | 8.64  | 5.84  | 2.92  |
| 8g daily continuous infusion | all                  | 69.91 | 34.95 | 48.82 | 24.41 |
|                              | less than 60 mL/min  | 93.60 | 46.80 | 79.14 | 39.57 |

|                         |       |       |       |       |
|-------------------------|-------|-------|-------|-------|
| 60 to 129<br>mL/min     | 72.11 | 36.06 | 44.78 | 22.39 |
| 130 mL/min and<br>above | 32.00 | 16.00 | 15.12 | 7.56  |

**Figure S1.** Goodness-of-fit plots for the population PK model of meropenem. (A) Observed versus population-predicted meropenem concentrations, (B) observed versus individual-predicted meropenem concentrations, (C) conditional weighted residuals versus time since the last dose, (D) conditional weighted residuals versus population-predicted meropenem concentrations. Solid black lines represent lines of identity in (A) and (B) and zero residuals in (C) and (D). Trend lines are shown in red.

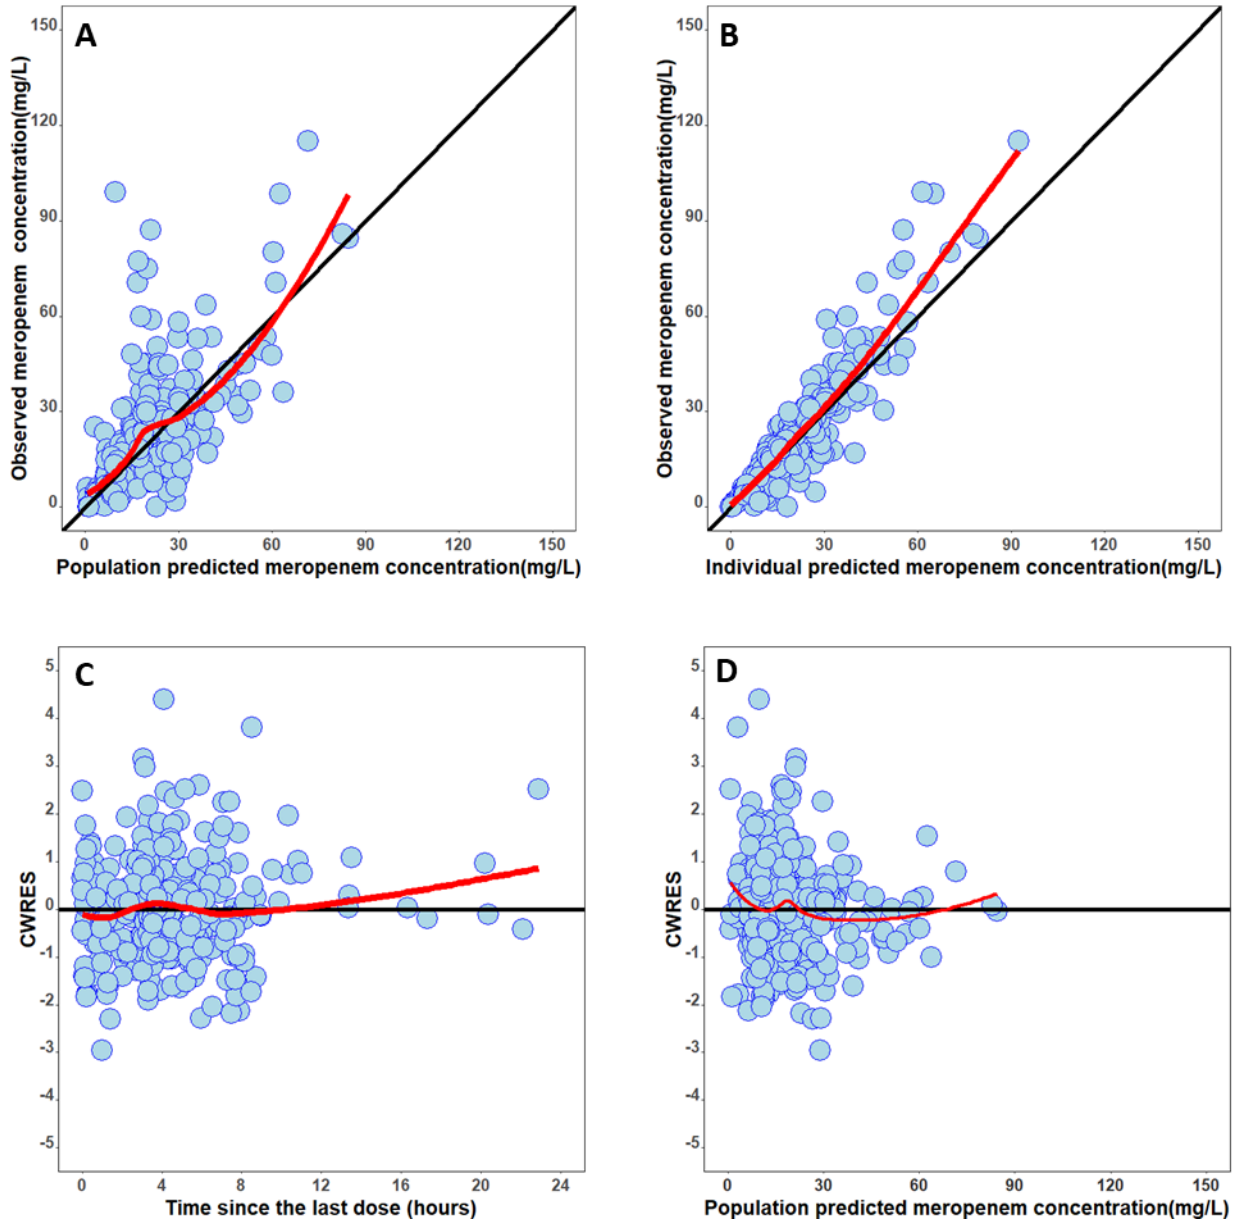



**Figure S2.** PTA of meropenem versus MIC following different dosing regimens with the target of 40%  $fT_{>MIC}$  (upper panel), 100%  $fT_{>MIC}$  (middle panel) and 100%  $fT_{>4\times MIC}$  (lower panel).

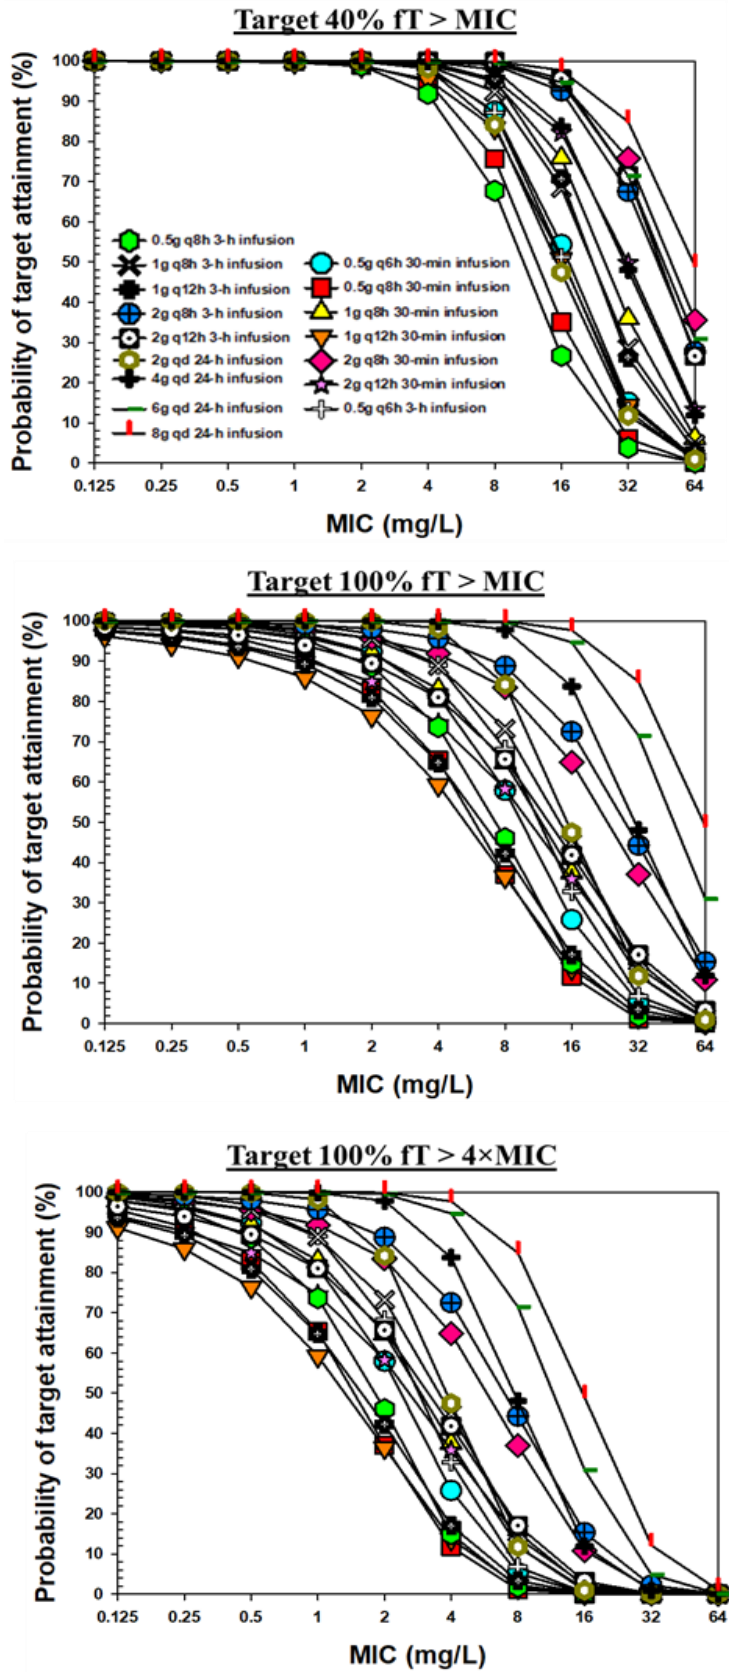

**Figure S3.** Heatmap of PTA of meropenem at different MIC values following different dosing regimens in all subjects as well as subjects with different renal functions with the PK/PD targets of 40%  $fT_{>MIC}$ , 100%  $fT_{>MIC}$ , and 100%  $fT_{>4\times MIC}$ . Color coding: green, PTA  $\geq 90\%$ ; yellow, PTA 80% - 89%; orange, PTA 50% - 79%; red, PTA  $< 50\%$

| DosingRegimen            | CrCL                 | Target 40% $fT_{>MIC}$ |        |        |        |        |        |        |       |       |       | Target 100% $fT_{>MIC}$ |        |        |        |        |       |       |       |       |        | Target 100% $fT_{>4\times MIC}$ |        |        |        |        |       |       |       |       |       |
|--------------------------|----------------------|------------------------|--------|--------|--------|--------|--------|--------|-------|-------|-------|-------------------------|--------|--------|--------|--------|-------|-------|-------|-------|--------|---------------------------------|--------|--------|--------|--------|-------|-------|-------|-------|-------|
|                          |                      | MIC (mg/L)             |        |        |        |        |        |        |       |       |       | MIC (mg/L)              |        |        |        |        |       |       |       |       |        | MIC (mg/L)                      |        |        |        |        |       |       |       |       |       |
|                          |                      | 0.125                  | 0.25   | 0.5    | 1      | 2      | 4      | 8      | 16    | 32    | 64    | 0.125                   | 0.25   | 0.5    | 1      | 2      | 4     | 8     | 16    | 32    | 64     | 0.125                           | 0.25   | 0.5    | 1      | 2      | 4     | 8     | 16    | 32    | 64    |
| 0.5g q6h 30-min infusion | all                  | 100.00                 | 99.98  | 99.98  | 99.96  | 99.86  | 98.14  | 87.53  | 54.35 | 15.09 | 1.23  | 99.68                   | 99.32  | 98.77  | 96.68  | 92.28  | 81.26 | 57.93 | 25.75 | 5.21  | 0.28   | 98.77                           | 96.68  | 92.28  | 81.26  | 57.93  | 25.75 | 5.21  | 0.28  | 0.00  |       |
|                          | less than 60 mL/min  | 100.00                 | 100.00 | 100.00 | 100.00 | 100.00 | 100.00 | 99.37  | 83.20 | 32.69 | 3.31  | 100.00                  | 100.00 | 100.00 | 99.89  | 99.60  | 97.77 | 89.14 | 53.20 | 13.37 | 0.74   | 100.00                          | 99.89  | 99.60  | 97.77  | 89.14  | 53.20 | 13.37 | 0.74  | 0.00  |       |
|                          | 130 mL/min and above | 100.00                 | 99.92  | 99.92  | 99.92  | 99.44  | 92.08  | 59.20  | 18.24 | 2.96  | 0.08  | 98.64                   | 97.20  | 95.04  | 87.20  | 72.96  | 48.40 | 19.60 | 5.60  | 0.96  | 0.08   | 95.04                           | 87.20  | 72.96  | 48.40  | 19.60  | 5.60  | 0.96  | 0.08  | 0.00  |       |
| 0.5g q8h 30-min infusion | all                  | 100.00                 | 99.98  | 99.93  | 99.77  | 98.98  | 94.91  | 75.67  | 35.05 | 6.05  | 0.23  | 98.46                   | 97.54  | 95.61  | 91.35  | 82.81  | 65.39 | 37.00 | 11.70 | 1.12  | 0.04   | 95.61                           | 91.35  | 82.81  | 65.39  | 37.00  | 11.70 | 1.12  | 0.04  | 0.00  |       |
|                          | less than 60 mL/min  | 100.00                 | 100.00 | 100.00 | 100.00 | 100.00 | 99.83  | 96.46  | 61.94 | 15.49 | 0.63  | 100.00                  | 99.94  | 99.77  | 97.66  | 93.03  | 69.14 | 27.77 | 3.31  | 0.06  | 99.77  | 99.31                           | 97.66  | 93.03  | 69.14  | 27.77  | 3.31  | 0.06  | 0.00  |       |       |
|                          | 130 mL/min and above | 100.00                 | 99.96  | 99.96  | 99.96  | 99.96  | 98.59  | 80.04  | 30.11 | 2.33  | 0.07  | 99.56                   | 99.19  | 95.41  | 87.19  | 65.63  | 28.85 | 5.59  | 0.11  | 0.04  | 98.19  | 95.41                           | 87.19  | 65.63  | 28.85  | 5.59   | 0.11  | 0.04  | 0.00  |       |       |
| 1g q8h 30-min infusion   | all                  | 100.00                 | 100.00 | 99.98  | 99.88  | 99.26  | 94.98  | 75.89  | 35.95 | 6.21  | 99.28 | 98.84                   | 97.89  | 95.98  | 92.02  | 83.04  | 64.81 | 37.47 | 11.79 | 1.32  | 97.89  | 95.98                           | 92.02  | 83.04  | 64.81  | 37.47  | 11.79 | 1.32  | 0.00  |       |       |
|                          | less than 60 mL/min  | 100.00                 | 100.00 | 100.00 | 100.00 | 100.00 | 100.00 | 100.00 | 96.34 | 65.49 | 15.60 | 100.00                  | 99.94  | 99.77  | 96.66  | 92.26  | 79.94 | 91.37 | 71.26 | 28.91 | 3.66   | 99.77                           | 96.66  | 92.26  | 79.94  | 91.37  | 71.26 | 28.91 | 3.66  | 0.23  |       |
|                          | 130 mL/min and above | 100.00                 | 100.00 | 100.00 | 100.00 | 100.00 | 99.96  | 97.96  | 79.04 | 29.59 | 2.63  | 99.93                   | 99.78  | 99.26  | 97.96  | 95.15  | 87.04 | 64.96 | 28.37 | 5.04  | 0.26   | 99.26                           | 97.96  | 95.15  | 87.04  | 64.96  | 28.37 | 5.04  | 0.26  | 0.00  |       |
| 1g q12h 30-min infusion  | all                  | 100.00                 | 100.00 | 100.00 | 100.00 | 100.00 | 100.00 | 99.96  | 97.96 | 79.04 | 29.59 | 2.63                    | 99.93  | 99.78  | 99.26  | 97.96  | 95.15 | 87.04 | 64.96 | 28.37 | 5.04   | 0.26                            | 99.26  | 97.96  | 95.15  | 87.04  | 64.96 | 28.37 | 5.04  | 0.26  | 0.00  |
|                          | less than 60 mL/min  | 100.00                 | 100.00 | 100.00 | 100.00 | 100.00 | 100.00 | 99.96  | 97.96 | 79.04 | 29.59 | 2.63                    | 99.93  | 99.78  | 99.26  | 97.96  | 95.15 | 87.04 | 64.96 | 28.37 | 5.04   | 0.26                            | 99.26  | 97.96  | 95.15  | 87.04  | 64.96 | 28.37 | 5.04  | 0.26  | 0.00  |
|                          | 130 mL/min and above | 99.96                  | 99.93  | 99.84  | 99.65  | 98.72  | 95.44  | 83.35  | 50.77 | 14.32 | 0.86  | 96.25                   | 94.07  | 91.14  | 85.91  | 76.39  | 59.21 | 36.39 | 13.67 | 2.23  | 0.11   | 91.14                           | 85.91  | 76.39  | 59.21  | 36.39  | 13.67 | 2.23  | 0.11  | 0.00  |       |
| 2g q8h 30-min infusion   | all                  | 100.00                 | 100.00 | 100.00 | 100.00 | 100.00 | 100.00 | 99.94  | 98.17 | 81.03 | 30.23 | 99.54                   | 99.26  | 99.03  | 98.34  | 97.77  | 94.63 | 86.97 | 69.31 | 33.71 | 6.91   | 99.03                           | 98.34  | 97.77  | 94.63  | 86.97  | 69.31 | 33.71 | 6.91  | 0.29  |       |
|                          | less than 60 mL/min  | 100.00                 | 99.96  | 99.96  | 99.96  | 99.93  | 99.89  | 98.70  | 87.52 | 45.89 | 7.26  | 99.15                   | 98.33  | 96.30  | 93.48  | 88.41  | 77.89 | 56.26 | 26.07 | 6.07  | 0.33   | 96.30                           | 93.48  | 88.41  | 77.89  | 56.26  | 26.07 | 6.07  | 0.33  | 0.04  |       |
|                          | 130 mL/min and above | 99.92                  | 99.92  | 99.76  | 99.44  | 98.72  | 95.12  | 82.32  | 48.16 | 14.64 | 2.40  | 92.08                   | 88.08  | 82.16  | 72.32  | 59.28  | 39.36 | 22.32 | 10.00 | 3.44  | 0.40   | 82.16                           | 72.32  | 59.28  | 39.36  | 22.32  | 10.00 | 3.44  | 0.40  | 0.08  |       |
| 0.5g q6h 3-h infusion    | all                  | 100.00                 | 100.00 | 100.00 | 100.00 | 100.00 | 99.80  | 87.18  | 51.26 | 12.88 | 0.75  | 99.95                   | 99.89  | 99.65  | 99.09  | 96.88  | 89.07 | 68.23 | 32.75 | 6.75  | 0.40   | 99.65                           | 99.09  | 96.88  | 89.07  | 68.23  | 32.75 | 6.75  | 0.40  | 0.04  |       |
|                          | less than 60 mL/min  | 100.00                 | 100.00 | 100.00 | 100.00 | 100.00 | 100.00 | 99.03  | 80.23 | 28.74 | 2.06  | 100.00                  | 100.00 | 100.00 | 99.94  | 99.54  | 93.83 | 63.43 | 17.77 | 1.26  | 100.00 | 99.94                           | 99.54  | 93.83  | 63.43  | 17.77  | 1.26  | 1.11  | 0.00  |       |       |
|                          | 130 mL/min and above | 100.00                 | 100.00 | 100.00 | 100.00 | 100.00 | 99.63  | 91.78  | 49.07 | 7.96  | 0.26  | 100.00                  | 100.00 | 100.00 | 99.93  | 99.07  | 94.59 | 69.48 | 24.59 | 2.33  | 0.04   | 100.00                          | 99.93  | 99.07  | 94.59  | 69.48  | 24.59 | 2.33  | 0.04  | 0.00  |       |
| 0.5g q8h 3-h infusion    | all                  | 100.00                 | 100.00 | 100.00 | 100.00 | 100.00 | 99.92  | 94.40  | 60.64 | 15.44 | 1.28  | 0.00                    | 99.76  | 95.52  | 98.40  | 96.08  | 87.92 | 62.48 | 29.68 | 7.44  | 0.88   | 0.00                            | 98.40  | 96.08  | 87.92  | 62.48  | 29.68 | 7.44  | 0.88  | 0.00  | 0.00  |
|                          | less than 60 mL/min  | 100.00                 | 100.00 | 100.00 | 100.00 | 100.00 | 99.71  | 93.14  | 51.77 | 9.71  | 0.46  | 100.00                  | 100.00 | 99.83  | 95.35  | 88.68  | 73.67 | 46.02 | 14.91 | 1.81  | 0.04   | 99.71                           | 95.35  | 88.68  | 73.67  | 46.02  | 14.91 | 1.81  | 0.04  | 0.00  |       |
|                          | 130 mL/min and above | 100.00                 | 100.00 | 100.00 | 100.00 | 100.00 | 99.89  | 96.26  | 70.07 | 20.33 | 1.56  | 0.00                    | 99.89  | 99.78  | 99.41  | 98.04  | 93.22 | 76.96 | 41.00 | 7.93  | 0.37   | 0.00                            | 99.41  | 98.04  | 93.22  | 76.96  | 41.00 | 7.93  | 0.37  | 0.00  | 0.00  |
| 1g q8h 3-h infusion      | all                  | 100.00                 | 100.00 | 100.00 | 100.00 | 100.00 | 100.00 | 99.77  | 93.54 | 56.29 | 12.80 | 100.00                  | 100.00 | 100.00 | 99.77  | 99.03  | 95.03 | 77.60 | 36.46 | 5.49  | 100.00 | 100.00                          | 99.77  | 99.03  | 95.03  | 77.60  | 36.46 | 5.49  | 0.00  |       |       |
|                          | less than 60 mL/min  | 100.00                 | 100.00 | 100.00 | 100.00 | 100.00 | 99.93  | 96.67  | 70.11 | 20.89 | 1.41  | 99.93                   | 99.89  | 99.78  | 99.41  | 98.37  | 93.56 | 76.44 | 38.33 | 7.37  | 0.44   | 99.78                           | 99.41  | 98.37  | 93.56  | 76.44  | 38.33 | 7.37  | 0.44  | 0.00  |       |
|                          | 130 mL/min and above | 100.00                 | 100.00 | 100.00 | 100.00 | 100.00 | 99.81  | 95.47  | 70.65 | 26.21 | 2.98  | 97.44                   | 95.93  | 93.58  | 89.30  | 80.86  | 64.77 | 42.23 | 17.04 | 3.35  | 0.16   | 93.58                           | 89.30  | 80.86  | 64.77  | 42.23  | 17.04 | 3.35  | 0.16  | 0.00  |       |
| 2g qd 24-h infusion      | all                  | 100.00                 | 100.00 | 100.00 | 100.00 | 100.00 | 100.00 | 99.71  | 92.46 | 48.23 | 7.71  | 99.66                   | 99.26  | 99.09  | 98.23  | 96.86  | 91.14 | 74.91 | 39.09 | 9.26  | 0.40   | 99.09                           | 98.23  | 96.86  | 91.14  | 74.91  | 39.09 | 9.26  | 0.40  | 0.00  |       |
|                          | less than 60 mL/min  | 100.00                 | 100.00 | 100.00 | 100.00 | 100.00 | 100.00 | 99.78  | 71.85 | 21.33 | 1.26  | 99.04                   | 98.15  | 96.48  | 92.70  | 84.30  | 64.74 | 35.11 | 9.22  | 0.96  | 0.04   | 96.48                           | 92.70  | 84.30  | 64.74  | 35.11  | 9.22  | 0.96  | 0.04  | 0.00  |       |
|                          | 130 mL/min and above | 100.00                 | 100.00 | 100.00 | 100.00 | 100.00 | 99.12  | 84.56  | 37.52 | 5.92  | 0.08  | 90.88                   | 86.48  | 79.60  | 69.44  | 51.04  | 27.92 | 11.84 | 3.04  | 0.24  | 0.00   | 79.60                           | 69.44  | 51.04  | 27.92  | 11.84  | 3.04  | 0.24  | 0.00  | 0.00  |       |
| 4g qd 24-h infusion      | all                  | 100.00                 | 100.00 | 100.00 | 100.00 | 100.00 | 100.00 | 99.85  | 96.83 | 68.11 | 21.04 | 99.93                   | 99.93  | 99.93  | 99.78  | 99.37  | 98.00 | 93.26 | 75.89 | 37.48 | 8.11   | 99.93                           | 99.78  | 99.37  | 98.00  | 93.26  | 75.89 | 37.48 | 8.11  | 0.30  |       |
|                          | less than 60 mL/min  | 100.00                 | 100.00 | 100.00 | 100.00 | 100.00 | 100.00 | 99.85  | 96.83 | 68.11 | 21.04 | 99.93                   | 99.93  | 99.93  | 99.78  | 99.37  | 98.00 | 93.26 | 75.89 | 37.48 | 8.11   | 99.93                           | 99.78  | 99.37  | 98.00  | 93.26  | 75.89 | 37.48 | 8.11  | 0.30  |       |
|                          | 130 mL/min and above | 100.00                 | 100.00 | 100.00 | 100.00 | 100.00 | 100.00 | 99.86  | 95.60 | 71.42 | 26.58 | 98.60                   | 97.77  | 96.46  | 93.93  | 89.46  | 81.02 | 65.65 | 41.79 | 17.04 | 3.18   | 96.46                           | 93.93  | 89.46  | 81.02  | 65.65  | 41.79 | 17.04 | 3.18  | 0.12  |       |
| 6g qd 24-h infusion      | all                  | 100.00                 | 100.00 | 100.00 | 100.00 | 100.00 | 100.00 | 99.89  | 90.74 | 49.77 | 99.83 | 99.83                   | 99.66  | 99.20  | 98.57  | 96.29  | 90.97 | 74.11 | 40.57 | 8.91  | 99.66  | 99.20                           | 98.57  | 96.29  | 90.97  | 74.11  | 40.57 | 8.91  | 0.40  |       |       |
|                          | less than 60 mL/min  | 100.00                 | 100.00 | 100.00 | 100.00 | 100.00 | 100.00 | 100.00 | 99.74 | 73.89 | 21.44 | 99.70                   | 99.11  | 98.33  | 96.30  | 92.52  | 84.44 | 65.67 | 34.74 | 8.11  | 0.85   | 98.33                           | 96.30  | 92.52  | 84.44  | 65.67  | 34.74 | 8.11  | 0.85  | 0.00  |       |
|                          | 130 mL/min and above | 100.00                 | 100.00 | 100.00 | 100.00 | 100.00 | 99.36  | 84.96  | 39.04 | 5.20  | 94.48 | 92.00                   | 87.92  | 81.44  | 70.08  | 52.24  | 30.16 | 11.76 | 3.36  | 0.16  | 87.92  | 81.44                           | 70.08  | 52.24  | 30.16  | 11.76  | 3.36  | 0.16  | 0.00  |       |       |
| 8g qd 24-h infusion      | all                  | 100.00                 | 100.00 | 100.00 | 100.00 | 100.00 | 100.00 | 98.63  | 77.60 | 27.94 | 2.74  | 100.00                  | 100.00 | 100.00 | 100.00 | 100.00 | 98.63 | 77.60 | 27.94 | 2.74  | 100.00 | 100.00                          | 100.00 | 100.00 | 100.00 | 98.63  | 77.60 | 27.94 | 2.74  |       |       |
|                          | less than 60 mL/min  | 100.00                 | 100.00 | 100.00 | 100.00 | 100.00 | 99.56  | 89.81  | 43.59 | 5.96  | 0.15  | 100.00                  | 100.00 | 100.00 | 100.00 | 100.00 | 99.56 | 89.81 | 43.59 | 5.96  | 0.15   | 100.00                          | 100.00 | 100.00 | 100.00 | 100.00 | 99.56 | 89.81 | 43.59 | 5.96  | 0.15  |
|                          | 130 mL/min and above | 100.00                 | 100.00 | 100.00 | 100.00 | 100.00 | 99.60  | 92.56  | 51.76 | 13.68 | 1.68  | 0.08                    | 100.00 | 100.00 | 100.00 | 100.00 | 99.60 | 92.56 | 51.76 | 13.68 | 1.68   | 0.08                            | 100.00 | 100.00 | 99.60  | 92.56  | 51.76 | 13.68 | 1.68  | 0.08  | 0.00  |
| 8g qd 24-h infusion      | all                  | 100.00                 | 100.00 | 100.00 | 100.00 | 100.00 | 99.84  | 97.88  | 83.74 | 48.04 | 11.89 | 100.00                  | 100.00 | 100.00 | 100.00 | 100.00 | 99.84 | 97.88 | 83.74 | 48.04 | 11.89  | 100.00                          | 100.00 | 100.00 | 100.00 | 100.00 | 99.84 | 97.88 | 83.74 | 48.04 | 11.89 |
